# Supplementary material for: Substrate specificity and transport mechanism of amino-acid transceptor Slimfast from Aedes aegypti
Source: PubMed Central journal article supplement (PMC4608377; doi:10.1038/ncomms9546), 2015-10-09
Supplement: NIHMS721104-supplement-1.pdf [file NIHMS721104-supplement-1.pdf]

## Supplemental Material

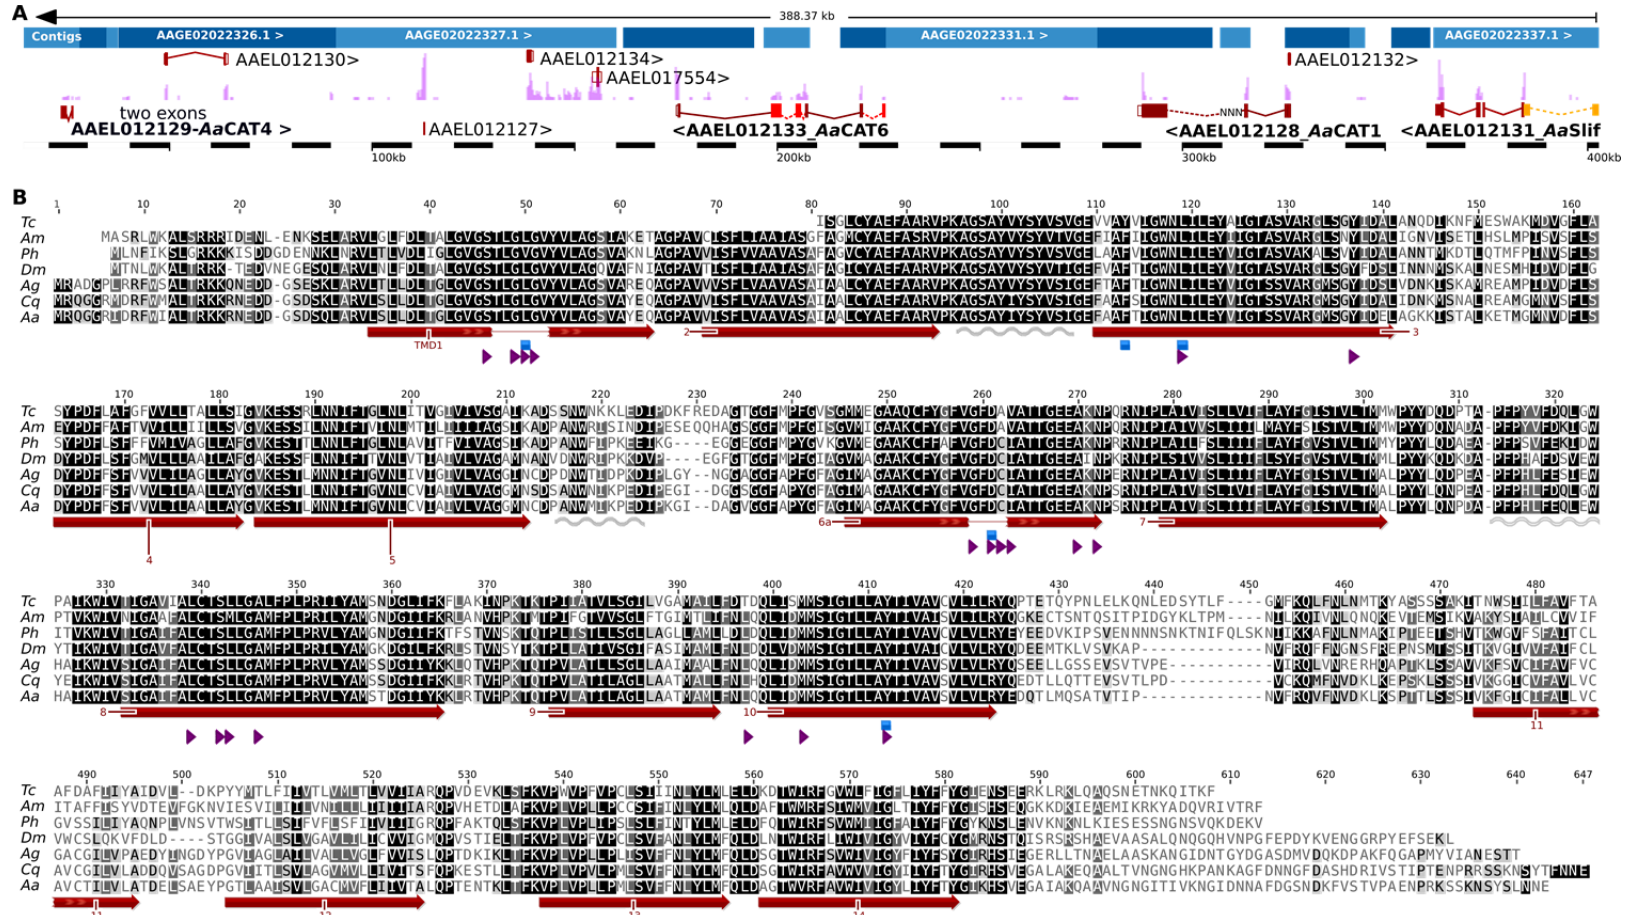

**Supplementary Figure 1 A. Structure of the AaSlif gene and associated gene cluster in the *Ae. aegypti* genome.** Experimentally validated splicing of the AaSlif gene from this study is shown as orange-colored shapes (dotted lines for intron and box for exons). Corrected splicing of previously cloned AaCAT1 cannot be shown in the figure as additional part is in a “gap (a stretch of Ns)” in the genome (shown as “NNN”). The corrected splicing of predicted AaCAT2 are shown as red shapes. Direction of the genes is shown as > and < symbols in the gene annotation. The magenta pattern represents a relative gene expression ratio in a mixed sex whole animal sample as retrieved from the current VectorBase data set after validation by new generation transcriptome sequencing (1). **B. A sequence alignment of orthologous Slif proteins from different insect species.** Transmembrane domains (TMD#, red arrow), substrate binding motif (magenta arrowhead), and known mutation sensitive site (blue square) were extrapolated from a consensus alignment of selected CATs with crystallized prokaryotic relative, *Methanocaldococcus jannaschii* MjApcT (2) and *Escherichia coli* EcAdiC (3), except for TMD11-14 that were defined by using a TMD prediction algorithm. The *slif* orthologs from *Tribolium castaneum* (Tc) was partially predicted due to incomplete upstream sequence in the genomic scaffold. The *Anopheles gambiae* (Ag) *slif* ortholog was partly annotated in VectorBase as two proteins (AGAP010560 and AGAP010561) and was defined as splicing domains of a single protein here using FGENESH+ (Softberry.com). The plausible translation of the predicted gen is included in the alignment.



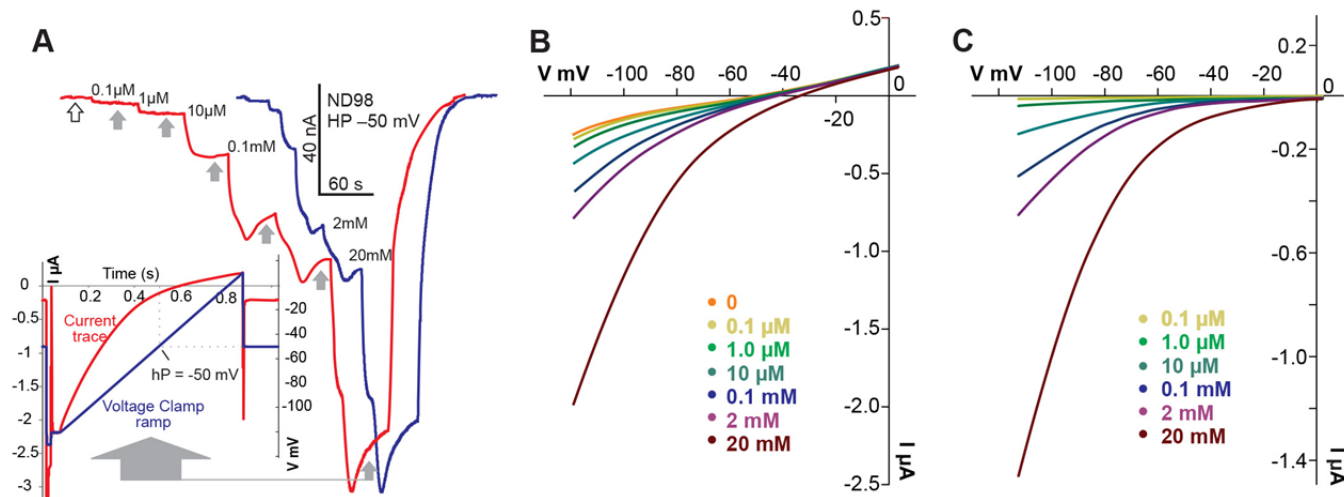

**Supplementary Figure 3. AaSlif substrate saturation kinetic and I/V plot.** A. Saturations kinetic of L-Arg transport is demonstrated as current traces recorded from AaSlif (red trace) and AaSlif-eGFP fusion (blue trace) expressing oocytes. L-Arg was applied in an increment staircase concentration trend as labeled on the panel. The arrows indicate points where voltage ramp was triggered to obtain current (I) and voltage (V) profiles as shown on insert (the short large-amplitude stimulation pikes were removed from the red current traces for clarity). Lower-left traces show a representative voltage ramp recording (red, current trace-left y-axis; blue, voltage trace-right y-axis). B. Superposed I/V plots at different concentration of L-Arg built from the ramp recorded in points indicated by arrows at panel A. C. I/V after subtraction of a leak current trace (orange trace on B), recorded at the point indicated by empty arrow on panel A.

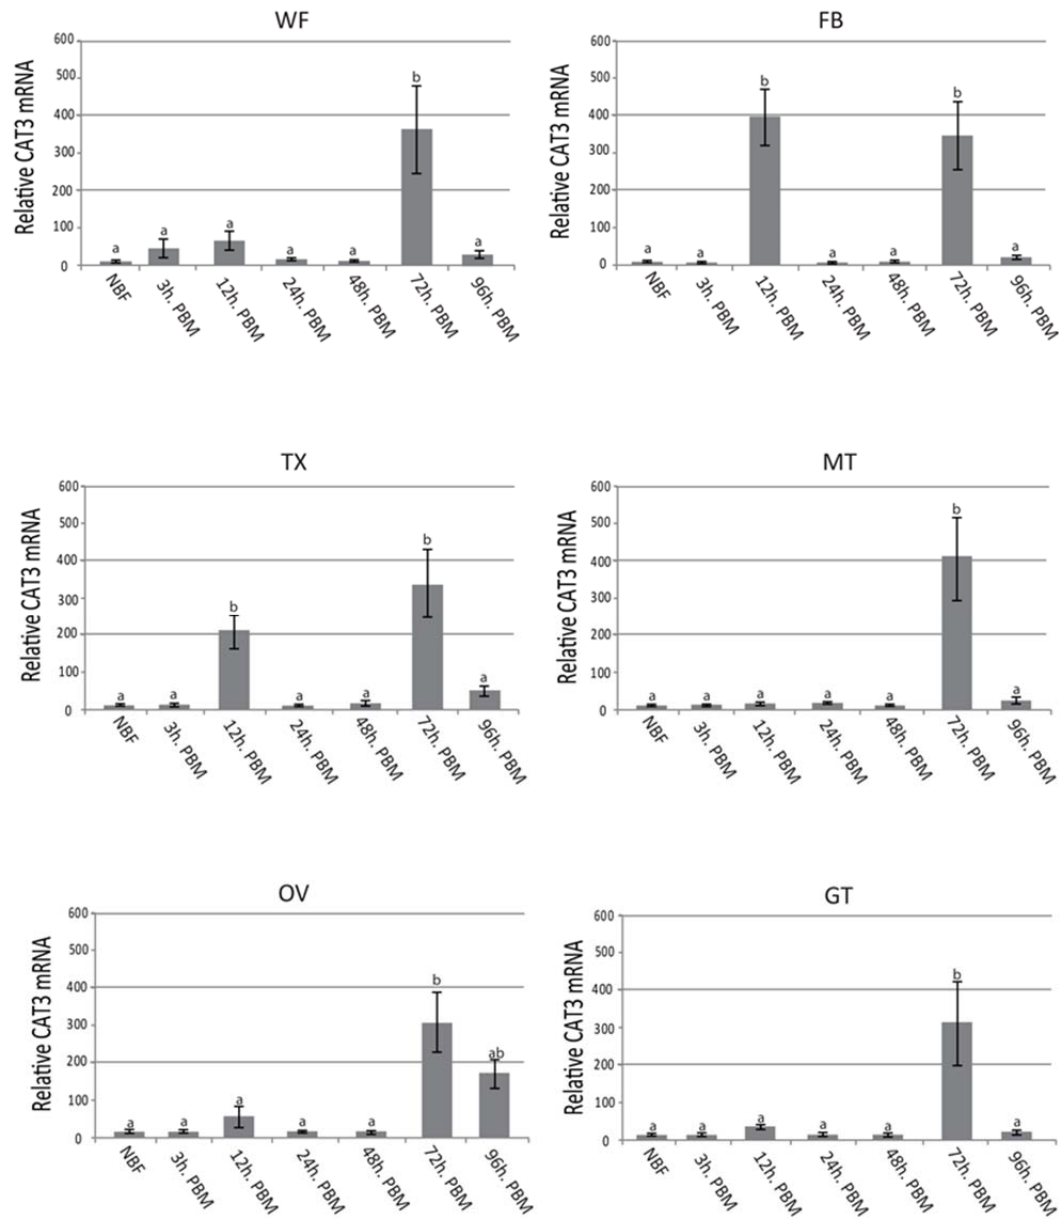

**Supplementary Figure 4. *Aedes aegypti* CAT3 expression in various tissues/organs.** Expression was assayed using qPCR. The data represent relative quantification of *Aedes* AQP3s which were normalized by qPCR analysis of ribosomal protein S7 (rpS7) mRNA levels in the cDNA samples. Values are means  $\pm$  S.E. (error bars) of triplicate biological samples with similar results. Means separated by Tukey-Kramer HSD ( $p < 0.05$ ). Means which share the same letter are not significantly different. RNA was isolated from whole body and various tissues/organs of adult female mosquitoes non-blood fed (NBF), 3h, 12h, 24h, 48h, 72h, and 96h post-blood meal (PBM). WF-Whole female, FB-fatbody, TX-thorax, MT – Malpighian tubules, OV – ovaries, GT-midgut.

**Supplementary Table 1. Recipes of the buffer solutions used for electrophysiological characterization of the AaSlif mechanism**

| Buffer # | Salt                                | mol wt | #1<br>98 Na <sup>+</sup> |     | #2<br>98 K <sup>+</sup> |     | #3<br>98 NMDG <sup>+</sup> |      | #4<br>98 Li <sup>+</sup> |     |
|----------|-------------------------------------|--------|--------------------------|-----|-------------------------|-----|----------------------------|------|--------------------------|-----|
|          |                                     |        | mM                       | g/l | mM                      | g/l | mM                         | g/l  | mM                       | g/l |
|          | NaCl                                | 58.44  | <b>98</b>                | 5.7 | <b>1.0</b>              |     |                            |      |                          |     |
|          | KCl                                 | 74.55  | <b>2.0</b>               |     | <b>98</b>               | 7.3 |                            |      |                          |     |
|          | NMDG                                | 195.2  |                          |     |                         |     | <b>98</b>                  | 19.1 |                          |     |
|          | LiCl                                | 24.4   |                          |     |                         |     |                            |      | <b>98</b>                | 4.2 |
|          | MgCl <sub>2</sub> 6H <sub>2</sub> O | 203    | <b>0.5</b>               | 0.1 | <b>0.5</b>              | 0.1 | <b>0.5</b>                 | 0.1  | <b>0.5</b>               | 0.1 |
|          | CaCl <sub>2</sub> 2H <sub>2</sub> O | 147.0  | <b>0.5</b>               | 0.1 | <b>0.5</b>              | 0.1 | <b>0.5</b>                 | 0.1  | <b>0.5</b>               | 0.1 |
|          | HEPES                               | 238.3  | <b>10</b>                | 2.4 | <b>10</b>               | 2.4 | <b>10</b>                  | 2.4  | <b>10</b>                | 2.4 |
|          | pH<br>(adjust)                      |        | 7.2<br>(4N NaOH)         |     | 7.2<br>(4N KOH)         |     | 7.2<br>(4N HCl)            |      | 7.2<br>(4N LiCl)         |     |

**Supplementary Table 2. Primer list used in the study**

| Name      | Use                                      | Sequence 5'-3'                                                          |
|-----------|------------------------------------------|-------------------------------------------------------------------------|
| GSPCAT3R1 | 5'RACE                                   | CCCACCCCCAGTCCGGTCAGATCC                                                |
| GSPCAT3R2 | nested 5'RACE                            | CCAGTCCGGTCAGATCCAGCAGCGA                                               |
| GSPCAT3R3 | nested 5'RACE                            | CCGGTCAGATCCAGCAGCGAGAGGAC                                              |
| CAT3F     | initial expression                       | <u>GGATCC</u> ATGATGCGCCAAGGTGGCCGGATAGACCGT                            |
| CAT3R     | initial expression                       | <u>GAATTC</u> TTCATTGTTGAGTGAGTACGAATTCTTGGA <sup>ACT</sup> CTTCCGGGGAT |
| CAT3XF_NB | codon-optimized subcloning               | GCTAGC <u>GGATCC</u> ACCATGCGTCAGG                                      |
| CAT3XR_NM | codon-optimized subcloning               | ACGCGT <u>GCGGCCGC</u> TTACTCGTTGTTTCAGAGAGTA                           |
| CATXGR_NM | codon-optimized subcloning (C-term eGFP) | ACGCGT <u>GCGGCCGC</u> TCACTTGTACAGCTCGTC                               |
| AaCAT3F   | qPCR                                     | AACGTGGGTCCGATTCGCCG                                                    |
| AaCAT3R   | qPCR                                     | TCTCGGCCGGGACTGTCGAT                                                    |

Relevant restriction sites are indicated by underline.

## Supplementary References

1. Gibbons JG, *et al.* (2009) Benchmarking next-generation transcriptome sequencing for functional and evolutionary genomics. *Mol Biol Evol* 26(12):2731-2744.
2. Shaffer PL, Goehring A, Shankaranarayanan A, & Gouaux E (2009) Structure and mechanism of a Na<sup>+</sup>-independent amino acid transporter. (Translated from eng) *Science* 325(5943):1010-1014 (in eng).
3. Gao X, *et al.* (2010) Mechanism of substrate recognition and transport by an amino acid antiporter. (Translated from eng) *Nature* 463(7282):828-832 (in eng).
4. Tamura K, *et al.* (2011) MEGA5: molecular evolutionary genetics analysis using maximum likelihood, evolutionary distance, and maximum parsimony methods. (Translated from eng) *Molecular biology and evolution* 28(10):2731-2739 (in eng).
5. Edgar RC (2004) MUSCLE: multiple sequence alignment with high accuracy and high throughput. (Translated from eng) *Nucleic acids research* 32(5):1792-1797 (in eng).
6. Krieger E, Koraimann G, & Vriend G (2002) Increasing the precision of comparative models with YASARA NOVA--a self-parameterizing force field. (Translated from eng) *Proteins* 47(3):393-402 (in eng).
7. Inc. CCG (2015) Molecular Operating Environment (MOE), 2013.08.
8. Kearse M, *et al.* (2012) Geneious Basic: an integrated and extendable desktop software platform for the organization and analysis of sequence data. *Bioinformatics* 28(12):1647-1649.
9. Huggett JF, *et al.* (2013) The digital MIQE guidelines: Minimum Information for Publication of Quantitative Digital PCR Experiments. *Clin Chem* 59(6):892-902.
10. Anonymous (2010) Primer BLAST.
